# Supplementary material
Source: PubMed Central journal article supplement (PMC5570662)
Supplement: NIHMS872165-supplement-Supp_info.pdf [file NIHMS872165-supplement-Supp_info.pdf]

Supplemental Table 1. PCR primer sequences.

---

|                               |         |                                 |
|-------------------------------|---------|---------------------------------|
| <i>Gapdh</i>                  | Forward | 5'-AGGTCGGTGTGAACGGATTTG-3'     |
|                               | Reverse | 5'-TGTAGACCATGTAGTTGAGGTCA-3'   |
| <i>Il-1<math>\beta</math></i> | Forward | 5'-GCAACTGTTTCCTGAACTCAACT-3'   |
|                               | Reverse | 5'-ATCTTTTGGGGTCCGTCAACT-3'     |
| <i>Il-6</i>                   | Forward | 5'-CACATGTTCTCTGGGAAATCGTGGA-3' |
|                               | Reverse | 5'-TCTCTCTGAAGGACTCTGGCTTTGT-3' |
| <i>Ifn<math>\gamma</math></i> | Forward | 5'-ATGAACGCTACACACTGCATC-3'     |
|                               | Reverse | 5'-CCATCCTTTTGCCAGTTCCTC-3'     |
| <i>Nos2</i>                   | Forward | 5'-GTTCTCAGCCCAACAATACAAGA-3'   |
|                               | Reverse | 5'-GTGGACGGGTCGATGTCAC-3'       |
| <i>Tnf</i>                    | Forward | 5'-CCCTCACACTCAGATCATCTTCT-3'   |
|                               | Reverse | 5'-GCTACGACGTGGGCTACAG-3'       |

---
